# Supplementary material for: G6PD Deficiency Prevalence and Estimates of Affected Populations in Malaria Endemic Countries: A Geostatistical Model-Based Map
Source: PubMed Central journal article supplement (PMC3496665; doi:10.1371/journal.pmed.1001339), 2012-11-13
Supplement: pmed.1001339.s008.pdf [file pmed.1001339.s008.pdf]

## Supplementary Tables

**Supplementary Table S1: National-level demographic metrics and G6PDd allele frequency and population estimates (in 1,000s)**

| Country                          | Total pop <sup>1,2</sup> | Sex-ratio <sup>3</sup> | Surveys | G6PDd allele freq (IQR) <sup>4</sup> | G6PDd males <sup>1</sup> (IQR) <sup>4</sup> | Homozygotes <sup>1,5</sup> | G6PDd females <sup>1</sup> (IQR) <sup>4</sup> |
|----------------------------------|--------------------------|------------------------|---------|--------------------------------------|---------------------------------------------|----------------------------|-----------------------------------------------|
| <b>African MECs<sup>6</sup></b>  |                          |                        |         |                                      |                                             |                            |                                               |
| Angola                           | 18,994                   | 98.1                   | 2       | 15.3% (10.4 - 22.2)                  | 1,435 (980 - 2,091)                         | 223                        | 947 (621 - 1,468)                             |
| Benin                            | 9,219                    | 97.3                   | 0       | 23.0% (17.0 - 30.1)                  | 1,044 (772 - 1,366)                         | 246                        | 706 (490 - 984)                               |
| Botswana†                        | 1,977                    | 101.7                  | 2       | 3.6% (2.0 - 6.5)                     | 36 (20 - 65)                                | 1                          | 19 (10 - 37)                                  |
| Burkina Faso                     | 16,250                   | 98.5                   | 0       | 9.4% (5.6 - 15.0)                    | 757 (455 - 1,206)                           | 72                         | 452 (256 - 772)                               |
| Burundi                          | 8,519                    | 96.3                   | 0       | 7.2% (3.3 - 15.2)                    | 301 (137 - 635)                             | 23                         | 169 (73 - 394)                                |
| Cameroon                         | 19,957                   | 99.7                   | 8       | 12.5% (9.9 - 15.5)                   | 1,248 (990 - 1,543)                         | 157                        | 750 (568 - 967)                               |
| Cape Verde†                      | 513                      | 98.0                   | 0       | 0.1% (0.0 - 0.5)                     | 0 (0 - 1)                                   | 0                          | 0 (0 - 1)                                     |
| Central African Republic         | 4,506                    | 97.1                   | 0       | 9.2% (4.7 - 17.3)                    | 203 (103 - 383)                             | 19                         | 126 (59 - 258)                                |
| Chad                             | 11,509                   | 98.9                   | 0       | 13.4% (8.5 - 20.2)                   | 767 (488 - 1,155)                           | 104                        | 496 (294 - 799)                               |
| Comoros                          | 691                      | 101.4                  | 0       | 14.0% (5.8 - 30.4)                   | 49 (20 - 106)                               | 7                          | 29 (10 - 71)                                  |
| Congo                            | 3,760                    | 100.2                  | 1       | 22.5% (17.3 - 29.6)                  | 424 (326 - 557)                             | 95                         | 277 (205 - 387)                               |
| Cote d'Ivoire                    | 21,571                   | 103.9                  | 0       | 15.0% (8.5 - 25.5)                   | 1,654 (931 - 2,800)                         | 240                        | 991 (514 - 1,843)                             |
| Democratic Republic of the Congo | 67,829                   | 98.9                   | 6       | 19.2% (14.7 - 25.1)                  | 6,488 (4,974 - 8,459)                       | 1,261                      | 4,425 (3,270 - 6,066)                         |
| Djibouti                         | 879                      | 100.1                  | 0       | 0.8% (0.3 - 2.7)                     | 4 (1 - 12)                                  | 0                          | 2 (1 - 6)                                     |
| Equatorial Guinea                | 693                      | 105.2                  | 0       | 11.4% (6.1 - 20.1)                   | 40 (22 - 72)                                | 4                          | 22 (11 - 43)                                  |
| Eritrea                          | 5,204                    | 97.1                   | 1       | 4.0% (2.7 - 6.1)                     | 103 (68 - 157)                              | 4                          | 56 (36 - 88)                                  |
| Ethiopia                         | 84,996                   | 99.1                   | 6       | 1.0% (0.7 - 1.5)                     | 422 (281 - 642)                             | 4                          | 218 (142 - 338)                               |
| Gabon                            | 1,501                    | 100.6                  | 0       | 12.3% (6.0 - 23.4)                   | 92 (45 - 176)                               | 11                         | 56 (25 - 117)                                 |
| Ghana                            | 24,339                   | 103.6                  | 2       | 19.6% (14.2 - 27)                    | 2,429 (1,764 - 3,341)                       | 460                        | 1,498 (1,031 - 2,194)                         |
| Guinea                           | 10,323                   | 102.1                  | 0       | 11.7% (7.4 - 18.8)                   | 611 (385 - 982)                             | 70                         | 357 (214 - 621)                               |
| Guinea-Bissau                    | 1,647                    | 98.3                   | 0       | 8.4% (4.4 - 15.3)                    | 68 (36 - 124)                               | 6                          | 39 (19 - 76)                                  |
| Kenya                            | 40,847                   | 99.8                   | 45      | 11.3% (9.2 - 13.7)                   | 2,310 (1,880 - 2,805)                       | 262                        | 1,377 (1,092 - 1,725)                         |
| Liberia                          | 4,102                    | 101.0                  | 1       | 9.5% (5.2 - 16.9)                    | 196 (107 - 348)                             | 19                         | 112 (58 - 216)                                |
| Madagascar                       | 20,146                   | 99.4                   | 1       | 19.4% (11.5 - 30.3)                  | 1,952 (1,154 - 3,046)                       | 382                        | 1,301 (711 - 2,212)                           |
| Malawi                           | 15,690                   | 100.1                  | 0       | 20.8% (10.2 - 36.4)                  | 1,629 (799 - 2,858)                         | 338                        | 1,067 (468 - 2,105)                           |
| Mali                             | 13,362                   | 99.8                   | 3       | 12.2% (8.6 - 17.3)                   | 813 (574 - 1,156)                           | 99                         | 499 (335 - 751)                               |
| Mauritania                       | 3,359                    | 101.0                  | 0       | 9.6% (4.6 - 18.5)                    | 162 (78 - 312)                              | 15                         | 95 (43 - 205)                                 |
| Mayotte                          | 199                      | 99.5                   | 0       | 12.4% (3.9 - 32.7)                   | 12 (4 - 32)                                 | 2                          | 7 (2 - 22)                                    |

| Country                          | Total pop <sup>1,2</sup> | Sex-ratio <sup>3</sup> | Surveys | G6PDd allele freq (IQR) <sup>4</sup> | G6PDd males <sup>1</sup> (IQR) <sup>4</sup> | Homozygotes <sup>1,5</sup> | G6PDd females <sup>1</sup> (IQR) <sup>4</sup> |
|----------------------------------|--------------------------|------------------------|---------|--------------------------------------|---------------------------------------------|----------------------------|-----------------------------------------------|
| Mozambique                       | 23,418                   | 94.8                   | 4       | 21.1% (14.7 - 29.8)                  | 2,404 (1,670 - 3,394)                       | 535                        | 1,703 (1,112 - 2,587)                         |
| Namibia†                         | 2,212                    | 98.7                   | 5       | 2.8% (1.8 - 4.6)                     | 31 (20 - 51)                                | 1                          | 17 (11 - 29)                                  |
| Niger                            | 15,885                   | 101.2                  | 0       | 5.3% (2.6 - 10.3)                    | 426 (211 - 819)                             | 22                         | 236 (111 - 497)                               |
| Nigeria                          | 158,255                  | 102.5                  | 6       | 16.9% (14.1 - 20.2)                  | 13,515 (11,317 - 16,185)                    | 2,224                      | 8,464 (6,898 - 10,477)                        |
| Rwanda                           | 10,277                   | 96.4                   | 0       | 5.8% (3.3 - 10.1)                    | 294 (169 - 509)                             | 18                         | 163 (90 - 298)                                |
| Sao Tome and Principe†           | 165                      | 98.1                   | 0       | 7.4% (2.3 - 20.8)                    | 6 (2 - 17)                                  | 0                          | 3 (1 - 11)                                    |
| Senegal                          | 12,866                   | 98.4                   | 1       | 15.1% (11.3 - 20.3)                  | 966 (720 - 1,295)                           | 148                        | 598 (424 - 847)                               |
| Sierra Leone                     | 5,837                    | 95.5                   | 0       | 7.9% (3.4 - 17.0)                    | 226 (98 - 485)                              | 19                         | 132 (53 - 313)                                |
| Somalia                          | 9,359                    | 98.4                   | 0       | 3.1% (1.2 - 7.7)                     | 145 (56 - 356)                              | 5                          | 80 (29 - 215)                                 |
| South Africa†                    | 50,523                   | 98.1                   | 0       | 3.3% (1.8 - 6.2)                     | 830 (438 - 1,563)                           | 28                         | 482 (242 - 960)                               |
| Sudan                            | 43,204                   | 101.5                  | 8       | 15.3% (12.7 - 18.2)                  | 3,322 (2,763 - 3,964)                       | 499                        | 2,118 (1,691 - 2,623)                         |
| Swaziland†                       | 1,195                    | 96.7                   | 0       | 8.7% (4.6 - 15.5)                    | 51 (27 - 91)                                | 5                          | 29 (15 - 57)                                  |
| The Gambia                       | 1,751                    | 97.6                   | 2       | 11.5% 8.1 - 15.9)                    | 99 (70 - 138)                               | 12                         | 58 (39 - 85)                                  |
| Togo                             | 6,774                    | 98.1                   | 3       | 21.2% (16.7 - 26.6)                  | 712 (560 - 893)                             | 154                        | 463 (346 - 616)                               |
| Uganda                           | 33,798                   | 99.9                   | 12      | 14.5% (12.8 - 16.5)                  | 2,457 (2,162 - 2,785)                       | 358                        | 1,468 (1,263 - 1,706)                         |
| United Republic of Tanzania      | 45,028                   | 99.8                   | 10      | 16.4% (11.9 - 22.3)                  | 3,685 (2,671 - 5,019)                       | 605                        | 2,372 (1,643 - 3,431)                         |
| Zambia                           | 13,254                   | 100.5                  | 1       | 21.0% (14.6 - 29.4)                  | 1,393 (971 - 1,950)                         | 291                        | 923 (606 - 1,393)                             |
| Zimbabwe                         | 12,645                   | 97.2                   | 2       | 14.8% (11.2 - 19.4)                  | 924 (698 - 1,212)                           | 141                        | 586 (421 - 808)                               |
| <b>American MECs<sup>6</sup></b> |                          |                        |         |                                      |                                             |                            |                                               |
| Argentina†                       | 40,668                   | 95.8                   | 1       | 0.9% (0.5 - 1.6)                     | 169 (98 - 313)                              | 2                          | 92 (51 - 181)                                 |
| Belize†                          | 313                      | 97.3                   | 0       | 2.2% (0.9 - 5.1)                     | 3 (1 - 8)                                   | 0                          | 2 (1 - 4)                                     |
| Bolivia                          | 9,995                    | 99.5                   | 0       | 0.2% (0.1 - 0.8)                     | 11 (3 - 41)                                 | 0                          | 6 (2 - 21)                                    |
| Brazil                           | 195,453                  | 96.9                   | 14      | 4.8% (3.6 - 6.5)                     | 4,647 (3,501 - 6,213)                       | 232                        | 2,758 (1,994 - 3,897)                         |
| Colombia                         | 46,305                   | 96.8                   | 2       | 4.9% (3.4 - 7.3)                     | 1,118 (764 - 1,667)                         | 57                         | 638 (419 - 1,008)                             |
| Costa Rica†                      | 4,640                    | 103.1                  | 3       | 0.4% (0.2 - 1.0)                     | 9 (4 - 23)                                  | 0                          | 4 (2 - 11)                                    |
| Dominican Republic†              | 10,225                   | 100.7                  | 0       | 3.0% (0.9 - 10.0)                    | 154 (44 - 511)                              | 5                          | 79 (22 - 288)                                 |
| Ecuador                          | 13,775                   | 100.3                  | 2       | 4.2% (2.4 - 7.5)                     | 292 (166 - 519)                             | 12                         | 157 (87 - 294)                                |
| El Salvador†                     | 6,201                    | 90.5                   | 1       | 3.3% (2.4 - 4.8)                     | 98 (69 - 140)                               | 4                          | 56 (39 - 81)                                  |
| French Guiana                    | 231                      | 100.3                  | 0       | 0.7% (0.3 - 1.6)                     | 1 (0 - 2)                                   | 0                          | 0 (0 - 1)                                     |
| Guatemala                        | 14,378                   | 95.1                   | 0       | 2.7% (1.5 - 5.1)                     | 189 (103 - 355)                             | 5                          | 102 (54 - 199)                                |
| Guyana                           | 761                      | 100.9                  | 0       | 3.0% (1.4 - 6.4)                     | 11 (5 - 25)                                 | 0                          | 6 (3 - 13)                                    |
| Haiti                            | 10,188                   | 98.4                   | 0       | 5.2% (1.9 - 13.2)                    | 261 (94 - 665)                              | 14                         | 141 (48 - 395)                                |
| Honduras                         | 7,609                    | 99.9                   | 0       | 2.9% (1.5 - 5.8)                     | 111 (55 - 219)                              | 3                          | 58 (28 - 118)                                 |

| Country                          | Total pop <sup>1,2</sup> | Sex-ratio <sup>3</sup> | Surveys | G6PDd allele freq (IQR) <sup>4</sup> | G6PDd males <sup>1</sup> (IQR) <sup>4</sup> | Homozygotes <sup>1,5</sup> | G6PDd females <sup>1</sup> (IQR) <sup>4</sup> |
|----------------------------------|--------------------------|------------------------|---------|--------------------------------------|---------------------------------------------|----------------------------|-----------------------------------------------|
| Mexico†                          | 110,568                  | 97.3                   | 25      | 1.0% (0.8 - 1.3)                     | 555 (430 - 733)                             | 6                          | 291 (222 - 387)                               |
| Nicaragua†                       | 5,822                    | 97.9                   | 0       | 1.5% (0.6 - 3.6)                     | 43 (18 - 103)                               | 1                          | 22 (9 - 56)                                   |
| Panama†                          | 3,508                    | 101.5                  | 0       | 0.9% (0.4 - 2.5)                     | 16 (6 - 44)                                 | 0                          | 8 (3 - 22)                                    |
| Paraguay†                        | 6,462                    | 101.8                  | 0       | 3.2% (1.1 - 8.8)                     | 105 (34 - 288)                              | 3                          | 54 (17 - 163)                                 |
| Peru                             | 29,493                   | 100.4                  | 3       | 0.2% (0.1 - 0.6)                     | 33 (13 - 84)                                | 0                          | 17 (6 - 43)                                   |
| Suriname                         | 524                      | 100.6                  | 5       | 0.7% (0.4 - 1.3)                     | 2 (1 - 3)                                   | 0                          | 1 (1 - 2)                                     |
| Venezuela                        | 29,044                   | 100.7                  | 0       | 8.6% (4.0 - 18.0)                    | 1,251 (583 - 2,617)                         | 107                        | 732 (316 - 1,701)                             |
| <b>Eurasian MECs<sup>6</sup></b> |                          |                        |         |                                      |                                             |                            |                                               |
| Afghanistan                      | 29,117                   | 107.2                  | 5       | 7.4% (5.6 - 9.8)                     | 1,115 (845 - 1,470)                         | 77                         | 599 (436 - 833)                               |
| Azerbaijan†                      | 8,932                    | 97.8                   | 17      | 10.2% (8.9 - 11.7)                   | 452 (393 - 518)                             | 47                         | 267 (228 - 314)                               |
| Bangladesh                       | 164,424                  | 102.6                  | 0       | 3.8% (2.4 - 5.9)                     | 3,168 (2,002 - 4,942)                       | 117                        | 1,624 (1,007 - 2,636)                         |
| Bhutan†                          | 723                      | 112.5                  | 0       | 5.9% (3.6 - 9.6)                     | 23 (14 - 37)                                | 1                          | 11 (6 - 18)                                   |
| Cambodia                         | 15,056                   | 95.8                   | 11      | 14.3% (11.8 - 17.2)                  | 1,055 (871 - 1,268)                         | 158                        | 653 (522 - 811)                               |
| China†                           | 1,381,796                | 108.0                  | 11      | 4.7% (3.5 - 6.8)                     | 33,675 (25,014 - 48,717)                    | 1,464                      | 18,555 (13,427 - 27,859)                      |
| Dem People's Rep of Korea†       | 23,963                   | 96.3                   | 0       | 0.1% (0.0 - 0.4)                     | 10 (2 - 42)                                 | 0                          | 5 (1 - 22)                                    |
| Georgia†                         | 4,221                    | 89.0                   | 2       | 1.1% (0.7 - 1.7)                     | 21 (14 - 33)                                | 0                          | 12 (8 - 19)                                   |
| India                            | 1,209,105                | 106.8                  | 45      | 8.0% (6.9 - 9.3)                     | 50,009 (43,246 - 57,985)                    | 3,748                      | 27,708 (23,452 - 32,947)                      |
| Indonesia                        | 232,544                  | 99.5                   | 33      | 7.1% (5.3 - 9.4)                     | 8,204 (6,180 - 10,901)                      | 583                        | 4,856 (3,484 - 6,756)                         |
| Iran (Islamic Republic of)†      | 75,084                   | 103.0                  | 12      | 11.8% (9.9 - 14.1)                   | 4,510 (3,788 - 5,356)                       | 518                        | 2,661 (2,186 - 3,256)                         |
| Iraq†                            | 31,443                   | 100.6                  | 1       | 10.6% (8.1 - 13.5)                   | 1,669 (1,279 - 2,130)                       | 176                        | 970 (720 - 1,297)                             |
| Korea, Rep of†                   | 48,517                   | 99.4                   | 0       | 0.2% (0.1 - 0.6)                     | 50 (17 - 145)                               | 0                          | 24 (8 - 72)                                   |
| Kyrgyzstan†                      | 5,545                    | 97.4                   | 0       | 0.3% (0.1 - 1.2)                     | 9 (3 - 33)                                  | 0                          | 5 (1 - 17)                                    |
| Lao People's Democratic Republic | 6,434                    | 99.6                   | 1       | 15.6% (11.6 - 20.5)                  | 500 (372 - 657)                             | 78                         | 315 (224 - 437)                               |
| Malaysia†                        | 27,949                   | 103.0                  | 12      | 8.0% (6.6 - 9.6)                     | 1,129 (942 - 1,359)                         | 87                         | 627 (506 - 782)                               |
| Myanmar                          | 50,503                   | 97.2                   | 7       | 6.1% (4.1 - 9.3)                     | 1,523 (1,028 - 2,309)                       | 96                         | 880 (577 - 1,384)                             |
| Nepal                            | 29,950                   | 98.4                   | 0       | 5.3% (2.9 - 9.4)                     | 786 (436 - 1,390)                           | 42                         | 434 (230 - 814)                               |
| Pakistan                         | 189,875                  | 103.4                  | 8       | 15.0% (10.8 - 20.4)                  | 14,495 (10,393 - 19,648)                    | 2,106                      | 8,900 (5,984 - 13,089)                        |
| Papua New Guinea                 | 6,887                    | 104.1                  | 34      | 7.4% (6.0 - 9.3)                     | 261 (212 - 325)                             | 19                         | 143 (114 - 185)                               |
| Philippines†                     | 93,617                   | 100.7                  | 636     | 2.5% (2.4 - 2.5)                     | 1,151 (1,117 - 1,187)                       | 28                         | 580 (556 - 604)                               |
| Saudi Arabia†                    | 26,207                   | 124.0                  | 19      | 12.4% (10.4 - 14.9)                  | 1,794 (1,511 - 2,161)                       | 179                        | 899 (741 - 1,113)                             |
| Solomon Islands†                 | 536                      | 107.1                  | 41      | 22.3% (15.7 - 30.9)                  | 62 (43 - 86)                                | 13                         | 38 (25 - 56)                                  |
| Sri Lanka†                       | 20,410                   | 97.5                   | 84      | 2.9% (2.6 - 3.3)                     | 291 (258 - 331)                             | 9                          | 161 (140 - 188)                               |
| Tajikistan†                      | 7,078                    | 96.9                   | 0       | 0.8% (0.4 - 1.9)                     | 29 (12 - 66)                                | 0                          | 15 (6 - 34)                                   |

| Country     | Total pop <sup>1,2</sup> | Sex-ratio <sup>3</sup> | Surveys | G6PDd allele freq (IQR) <sup>4</sup> | G6PDd males <sup>1</sup> (IQR) <sup>4</sup> | Homozygotes <sup>1,5</sup> | G6PDd females <sup>1</sup> (IQR) <sup>4</sup> |
|-------------|--------------------------|------------------------|---------|--------------------------------------|---------------------------------------------|----------------------------|-----------------------------------------------|
| Thailand†   | 68,141                   | 96.7                   | 20      | 13.6% (11.9 - 15.5)                  | 4,544 (3,981 - 5,188)                       | 638                        | 2,830 (2,428 - 3,312)                         |
| Timor-Leste | 1,168                    | 104.0                  | 0       | 5.0% (2.5 - 9.7)                     | 29 (15 - 58)                                | 1                          | 15 (7 - 31)                                   |
| Turkey†     | 75,699                   | 99.5                   | 79      | 3.8% (3.0 - 4.9)                     | 1,437 (1,128 - 1,850)                       | 55                         | 783 (601 - 1,034)                             |
| Uzbekistan† | 27,790                   | 98.8                   | 0       | 1.0% (0.4 - 2.4)                     | 132 (53 - 330)                              | 1                          | 68 (27 - 179)                                 |
| Vanuatu†    | 246                      | 103.8                  | 17      | 8.0% (6.9 - 9.3)                     | 10 (9 - 12)                                 | 1                          | 5 (4 - 6)                                     |
| Viet Nam†   | 89,016                   | 97.7                   | 6       | 8.9% (6.0 - 13.9)                    | 3,902 (2,625 - 6,102)                       | 354                        | 2,310 (1,488 - 3,922)                         |
| Yemen       | 24,324                   | 101.3                  | 0       | 4.6% (1.9 - 10.9)                    | 565 (238 - 1,329)                           | 26                         | 308 (121 - 781)                               |

<sup>1</sup> All population estimates are in 1,000s

<sup>2</sup> Source: GRUMP-adjusted UN population projected population estimates for 2010; World Population Prospects, the 2008 Revision.

<sup>3</sup> Number of males per 100 females in 2010. Source: United Nations Department of Economics and Social Affairs (2011) World Population Prospects, the 2010 Revision. <http://esa.un.org/unpd/wpp/Excel-Data/population.htm>.

<sup>4</sup> Interquartile range of the posterior predictive distribution for each G6PDd population estimate

<sup>5</sup> Homozygous female estimates are derived directly from the median allele frequency estimates, so are not given with modelled IQRs

<sup>6</sup> Malaria Endemic Countries (Protocol S1.6)

† Countries targetting malaria elimination
