# Supplementary material for: G6PD Deficiency Prevalence and Estimates of Affected Populations in Malaria Endemic Countries: A Geostatistical Model-Based Map
Source: PubMed Central journal article supplement (PMC3496665; doi:10.1371/journal.pmed.1001339), 2012-11-13
Supplement: pmed.1001339.s009.pdf [file pmed.1001339.s009.pdf]

**Supplementary Table S2: National areal prediction summary statistics and Monte Carlo standard errors (SE) for each model output**

| Country              | Allele frequency (SE) |               |               |               | G6PDd male population (SE) |              |              |             | G6PDd female population (SE) |              |              |              |
|----------------------|-----------------------|---------------|---------------|---------------|----------------------------|--------------|--------------|-------------|------------------------------|--------------|--------------|--------------|
|                      | Mean                  | Q25%          | Median        | Q75%          | Mean                       | Q25%         | Median       | Q75%        | Mean                         | Q25%         | Median       | Q75%         |
| <b>African MECs</b>  |                       |               |               |               |                            |              |              |             |                              |              |              |              |
| Angola               | 17.4 (0.06) %         | 10.4 (0.10) % | 15.3 (0.10) % | 22.2 (0.10) % | 1,635 (5.9)                | 980 (9.6)    | 1,435 (9.6)  | 2,091 (2.1) | 1,143 (4.6)                  | 621 (7.1)    | 947 (6.6)    | 1,468 (11.0) |
| Benin                | 24.0 (0.08) %         | 17.0 (0.11) % | 23.0 (0.07) % | 30.1 (0.13) % | 1,091 (3.5)                | 772 (5.0)    | 1,044 (3.3)  | 1,366 (1.4) | 769 (3.0)                    | 490 (3.1)    | 706 (3.2)    | 984 (6.4)    |
| Botswana             | 5.2 (0.04) %          | 2.0 (0.02) %  | 3.6 (0.04) %  | 6.5 (0.07) %  | 52 (0.3)                   | 20 (0.2)     | 36 (0.4)     | 65 (0.1)    | 30 (0.2)                     | 10 (0.1)     | 19 (0.2)     | 37 (0.4)     |
| Burkina Faso         | 11.4 (0.08) %         | 5.6 (0.04) %  | 9.4 (0.06) %  | 15.0 (0.21) % | 920 (6.7)                  | 455 (3.3)    | 757 (4.9)    | 1,206 (1.2) | 592 (5.0)                    | 256 (2.4)    | 452 (3.1)    | 772 (13.0)   |
| Burundi              | 11.3 (0.12) %         | 3.3 (0.07) %  | 7.2 (0.09) %  | 15.2 (0.22) % | 473 (5.1)                  | 137 (2.8)    | 301 (3.9)    | 635 (0.6)   | 314 (3.9)                    | 73 (1.4)     | 169 (2.5)    | 394 (6.2)    |
| Cameroon             | 13.0 (0.04) %         | 9.9 (0.05) %  | 12.5 (0.05) % | 15.5 (0.06) % | 1,297 (4.3)                | 990 (5.2)    | 1,248 (4.8)  | 1,543 (1.5) | 798 (3.8)                    | 568 (3.0)    | 750 (3.8)    | 967 (5.6)    |
| Cape Verde           | 1.0 (0.03) %          | 0.0 (0.00) %  | 0.1 (0.00) %  | 0.5 (0.01) %  | 3 (0.1)                    | 0 (0.0)      | 0 (0.0)      | 1 (0.0)     | 2 (0.1)                      | 0 (0.0)      | 0 (0.0)      | 1 (0.0)      |
| Central African Rep  | 12.5 (0.13) %         | 4.7 (0.09) %  | 9.2 (0.12) %  | 17.3 (0.22) % | 277 (2.8)                  | 103 (2.0)    | 203 (2.6)    | 383 (0.4)   | 192 (2.2)                    | 59 (1.2)     | 126 (1.9)    | 258 (4.2)    |
| Chad                 | 15.4 (0.13) %         | 8.5 (0.09) %  | 13.4 (0.15) % | 20.2 (0.25) % | 882 (7.2)                  | 488 (5.3)    | 767 (8.3)    | 1,155 (1.2) | 605 (6.1)                    | 294 (3.8)    | 496 (6.5)    | 799 (12.6)   |
| Comoros              | 20.6 (0.15) %         | 5.8 (0.14) %  | 14.0 (0.17) % | 30.4 (0.24) % | 72 (0.5)                   | 20 (0.5)     | 49 (0.6)     | 106 (0.1)   | 50 (0.4)                     | 10 (0.2)     | 29 (0.4)     | 71 (0.8)     |
| Congo                | 24.2 (0.12) %         | 17.3 (0.14) % | 22.5 (0.12) % | 29.6 (0.17) % | 456 (2.2)                  | 326 (2.6)    | 424 (2.3)    | 557 (0.6)   | 312 (1.7)                    | 205 (1.7)    | 277 (1.9)    | 387 (2.7)    |
| Cote d'Ivoire        | 18.6 (0.19) %         | 8.5 (0.10) %  | 15.0 (0.23) % | 25.5 (0.31) % | 2,045 (21.3)               | 931 (11.3)   | 1,654 (24.8) | 2,800 (2.8) | 1,358 (16.5)                 | 514 (7.9)    | 991 (16.9)   | 1,843 (26.3) |
| Dem Rep of the Congo | 20.5 (0.11) %         | 14.7 (0.12) % | 19.2 (0.11) % | 25.1 (0.15) % | 6,928 (35.8)               | 4,974 (41.5) | 6,488 (37.0) | 8,459 (8.5) | 4,891 (28.5)                 | 3,270 (30.6) | 4,425 (33.1) | 6,066 (37.1) |
| Djibouti             | 2.9 (0.04) %          | 0.3 (0.01) %  | 0.8 (0.02) %  | 2.7 (0.06) %  | 13 (0.2)                   | 1 (0.0)      | 4 (0.1)      | 12 (0.0)    | 7 (0.1)                      | 1 (0.0)      | 2 (0.0)      | 6 (0.1)      |
| Equatorial Guinea    | 14.8 (0.09) %         | 6.1 (0.09) %  | 11.4 (0.12) % | 20.1 (0.09) % | 53 (0.3)                   | 22 (0.3)     | 40 (0.4)     | 72 (0.1)    | 33 (0.2)                     | 11 (0.2)     | 22 (0.2)     | 43 (0.4)     |
| Eritrea              | 4.8 (0.04) %          | 2.7 (0.03) %  | 4.0 (0.04) %  | 6.1 (0.07) %  | 124 (1.1)                  | 68 (0.8)     | 103 (1.1)    | 157 (0.2)   | 70 (0.7)                     | 36 (0.4)     | 56 (0.6)     | 88 (1.1)     |
| Ethiopia             | 1.2 (0.01) %          | 0.7 (0.01) %  | 1.0 (0.01) %  | 1.5 (0.01) %  | 515 (4.9)                  | 281 (2.4)    | 422 (3.0)    | 642 (0.6)   | 275 (3.0)                    | 142 (1.3)    | 218 (1.6)    | 338 (3.2)    |
| Gabon                | 16.8 (0.15) %         | 6.0 (0.06) %  | 12.3 (0.18) % | 23.4 (0.31) % | 126 (1.2)                  | 45 (0.4)     | 92 (1.3)     | 176 (0.2)   | 87 (1.0)                     | 25 (0.2)     | 56 (0.9)     | 117 (1.6)    |
| Ghana                | 21.5 (0.08) %         | 14.2 (0.11) % | 19.6 (0.09) % | 27.0 (0.10) % | 2,664 (10.4)               | 1,764 (13.4) | 2,429 (11.0) | 3,341 (3.3) | 1,727 (8.1)                  | 1,031 (7.5)  | 1,498 (7.0)  | 2,194 (9.3)  |
| Guinea               | 14.4 (0.08) %         | 7.4 (0.06) %  | 11.7 (0.09) % | 18.8 (0.15) % | 749 (3.9)                  | 385 (3.3)    | 611 (4.7)    | 982 (1.0)   | 479 (3.0)                    | 214 (1.7)    | 357 (3.6)    | 621 (6.8)    |
| Guinea-Bissau        | 11.4 (0.08) %         | 4.4 (0.06) %  | 8.4 (0.07) %  | 15.3 (0.21) % | 93 (0.7)                   | 36 (0.5)     | 68 (0.6)     | 124 (0.1)   | 59 (0.5)                     | 19 (0.3)     | 39 (0.5)     | 76 (1.0)     |
| Kenya                | 11.7 (0.05) %         | 9.2 (0.06) %  | 11.3 (0.05) % | 13.7 (0.08) % | 2,394 (10.0)               | 1,880 (12.3) | 2,310 (9.6)  | 2,805 (2.8) | 1,454 (6.4)                  | 1,092 (7.7)  | 1,377 (6.1)  | 1,725 (9.7)  |
| Liberia              | 12.7 (0.12) %         | 5.2 (0.05) %  | 9.5 (0.09) %  | 16.9 (0.20) % | 261 (2.5)                  | 107 (1.1)    | 196 (1.8)    | 348 (0.3)   | 166 (1.9)                    | 58 (0.6)     | 112 (1.3)    | 216 (3.4)    |
| Madagascar           | 22.3 (0.11) %         | 11.5 (0.12) % | 19.4 (0.16) % | 30.3 (0.20) % | 2,241 (11.4)               | 1,154 (12.4) | 1,952 (16.6) | 3,046 (3.0) | 1,626 (10.3)                 | 711 (8.7)    | 1,301 (12.5) | 2,212 (17.7) |
| Malawi               | 25.4 (0.17) %         | 10.2 (0.18) % | 20.8 (0.31) % | 36.4 (0.25) % | 1,991 (13.0)               | 799 (14.3)   | 1,629 (24.1) | 2,858 (2.9) | 1,471 (11.1)                 | 468 (9.7)    | 1,067 (17.7) | 2,105 (16.9) |
| Mali                 | 13.7 (0.08) %         | 8.6 (0.07) %  | 12.2 (0.07) % | 17.3 (0.12) % | 918 (5.0)                  | 574 (4.9)    | 813 (4.8)    | 1,156 (1.2) | 592 (3.8)                    | 335 (2.6)    | 499 (3.6)    | 751 (6.6)    |
| Mauritania           | 13.4 (0.09) %         | 4.6 (0.06) %  | 9.6 (0.08) %  | 18.5 (0.19) % | 226 (1.5)                  | 78 (1.1)     | 162 (1.3)    | 312 (0.3)   | 153 (1.4)                    | 43 (0.7)     | 95 (1.0)     | 205 (2.6)    |
| Mayotte              | 21.6 (0.21) %         | 3.9 (0.10) %  | 12.4 (0.24) % | 32.7 (0.57) % | 21 (0.2)                   | 4 (0.1)      | 12 (0.2)     | 32 (0.0)    | 16 (0.2)                     | 2 (0.1)      | 7 (0.2)      | 22 (0.5)     |
| Mozambique           | 23.1 (0.09) %         | 14.7 (0.10) % | 21.1 (0.15) % | 29.8 (0.20) % | 2,631 (9.7)                | 1,670 (11.8) | 2,404 (16.9) | 3,394 (3.4) | 1,972 (9.0)                  | 1,112 (9.3)  | 1,703 (15.4) | 2,587 (20.6) |
| Namibia              | 4.0 (0.05) %          | 1.8 (0.03) %  | 2.8 (0.04) %  | 4.6 (0.07) %  | 44 (0.6)                   | 20 (0.4)     | 31 (0.4)     | 51 (0.1)    | 26 (0.3)                     | 11 (0.2)     | 17 (0.2)     | 29 (0.4)     |

| Country                | Allele frequency (SE) |               |               |               | G6PDd male population (SE) |               |               |               | G6PDd female population (SE) |              |              |               |
|------------------------|-----------------------|---------------|---------------|---------------|----------------------------|---------------|---------------|---------------|------------------------------|--------------|--------------|---------------|
|                        | Mean                  | Q25%          | Median        | Q75%          | Mean                       | Q25%          | Median        | Q75%          | Mean                         | Q25%         | Median       | Q75%          |
| Niger                  | 7.7 (0.08) %          | 2.6 (0.05) %  | 5.3 (0.06) %  | 10.3 (0.16) % | 617 (6.0)                  | 211 (3.7)     | 426 (4.7)     | 819 (0.8)     | 387 (4.7)                    | 111 (2.1)    | 236 (2.7)    | 497 (8.5)     |
| Nigeria                | 17.5 (0.07) %         | 14.1 (0.08) % | 16.9 (0.07) % | 20.2 (0.10) % | 14,021 (52.3)              | 11,317 (63.9) | 13,515 (54.2) | 16,185 (16.2) | 8,920 (36.9)                 | 6,898 (44.0) | 8,464 (39.2) | 10,477 (51.0) |
| Rwanda                 | 7.7 (0.04) %          | 3.3 (0.03) %  | 5.8 (0.06) %  | 10.1 (0.07) % | 389 (2.1)                  | 169 (1.5)     | 294 (2.8)     | 509 (0.5)     | 234 (1.6)                    | 90 (0.6)     | 163 (1.7)    | 298 (2.8)     |
| Sao Tome and Principe  | 15.0 (0.23) %         | 2.3 (0.05) %  | 7.4 (0.18) %  | 20.8 (0.57) % | 12 (0.2)                   | 2 (0.0)       | 6 (0.1)       | 17 (0.0)      | 9 (0.2)                      | 1 (0.0)      | 3 (0.1)      | 11 (0.3)      |
| Senegal                | 16.4 (0.05) %         | 11.3 (0.05) % | 15.1 (0.06) % | 20.3 (0.10) % | 1,046 (3.4)                | 720 (3.0)     | 966 (4.1)     | 1,295 (1.3)   | 675 (2.7)                    | 424 (1.6)    | 598 (2.3)    | 847 (5.2)     |
| Sierra Leone           | 12.5 (0.13) %         | 3.4 (0.04) %  | 7.9 (0.07) %  | 17.0 (0.17) % | 356 (3.6)                  | 98 (1.1)      | 226 (2.0)     | 485 (0.5)     | 247 (3.3)                    | 53 (0.7)     | 132 (1.6)    | 313 (4.8)     |
| Somalia                | 6.1 (0.08) %          | 1.2 (0.03) %  | 3.1 (0.07) %  | 7.7 (0.16) %  | 282 (3.6)                  | 56 (1.3)      | 145 (3.4)     | 356 (0.4)     | 186 (2.5)                    | 29 (0.7)     | 80 (2.2)     | 215 (5.1)     |
| South Africa           | 5.0 (0.04) %          | 1.8 (0.04) %  | 3.3 (0.04) %  | 6.2 (0.07) %  | 1,244 (9.4)                | 438 (9.0)     | 830 (10.8)    | 1,563 (1.6)   | 793 (6.7)                    | 242 (4.9)    | 482 (5.6)    | 960 (11.9)    |
| Sudan                  | 15.6 (0.06) %         | 12.7 (0.06) % | 15.3 (0.06) % | 18.2 (0.08) % | 3,402 (13.6)               | 2,763 (12.8)  | 3,322 (13.1)  | 3,964 (4.0)   | 2,202 (10.6)                 | 1,691 (9.5)  | 2,118 (9.2)  | 2,623 (15.5)  |
| Swaziland              | 11.6 (0.09) %         | 4.6 (0.05) %  | 8.7 (0.08) %  | 15.5 (0.12) % | 68 (0.5)                   | 27 (0.3)      | 51 (0.5)      | 91 (0.1)      | 44 (0.4)                     | 15 (0.2)     | 29 (0.3)     | 57 (0.5)      |
| The Gambia             | 12.6 (0.09) %         | 8.1 (0.06) %  | 11.5 (0.08) % | 15.9 (0.16) % | 109 (0.8)                  | 70 (0.5)      | 99 (0.7)      | 138 (0.1)     | 67 (0.6)                     | 39 (0.3)     | 58 (0.4)     | 85 (1.0)      |
| Togo                   | 22.1 (0.08) %         | 16.7 (0.09) % | 21.2 (0.13) % | 26.6 (0.12) % | 741 (2.7)                  | 560 (3.2)     | 712 (4.3)     | 893 (0.9)     | 499 (2.3)                    | 346 (2.5)    | 463 (3.0)    | 616 (3.5)     |
| Uganda                 | 14.8 (0.02) %         | 12.8 (0.03) % | 14.5 (0.03) % | 16.5 (0.03) % | 2,493 (3.5)                | 2,162 (5.1)   | 2,457 (4.8)   | 2,785 (2.8)   | 1,504 (2.2)                  | 1,263 (2.8)  | 1,468 (2.8)  | 1,706 (3.5)   |
| United Rep of Tanzania | 17.9 (0.08) %         | 11.9 (0.10) % | 16.4 (0.09) % | 22.3 (0.16) % | 4,027 (18.6)               | 2,671 (21.4)  | 3,685 (21.0)  | 5,019 (5.0)   | 2,716 (15.0)                 | 1,643 (14.4) | 2,372 (16.8) | 3,431 (33.8)  |
| Zambia                 | 22.9 (0.13) %         | 14.6 (0.15) % | 21.0 (0.11) % | 29.4 (0.18) % | 1,520 (8.8)                | 971 (9.7)     | 1,393 (7.1)   | 1,950 (2.0)   | 1,069 (7.6)                  | 606 (6.2)    | 923 (6.5)    | 1,393 (10.2)  |
| Zimbabwe               | 15.9 (0.05) %         | 11.2 (0.04) % | 14.8 (0.07) % | 19.4 (0.09) % | 988 (3.2)                  | 698 (2.4)     | 924 (4.3)     | 1,212 (1.2)   | 650 (2.6)                    | 421 (1.5)    | 586 (3.6)    | 808 (4.3)     |
| <b>American MECs</b>   |                       |               |               |               |                            |               |               |               |                              |              |              |               |
| Argentina              | 1.3 (0.03) %          | 0.5 (0.01) %  | 0.9 (0.02) %  | 1.6 (0.04) %  | 261 (5.1)                  | 98 (2.1)      | 169 (3.5)     | 313 (0.3)     | 159 (3.3)                    | 51 (1.1)     | 92 (2.1)     | 181 (5.1)     |
| Belize                 | 4.1 (0.04) %          | 0.9 (0.01) %  | 2.2 (0.03) %  | 5.1 (0.07) %  | 6 (0.1)                    | 1 (0.0)       | 3 (0.1)       | 8 (0.0)       | 4 (0.1)                      | 1 (0.0)      | 2 (0.0)      | 4 (0.1)       |
| Bolivia                | 1.0 (0.02) %          | 0.1 (0.00) %  | 0.2 (0.01) %  | 0.8 (0.02) %  | 51 (1.1)                   | 3 (0.1)       | 11 (0.3)      | 41 (0.0)      | 30 (0.8)                     | 2 (0.0)      | 6 (0.2)      | 21 (0.6)      |
| Brazil                 | 5.4 (0.04) %          | 3.6 (0.02) %  | 4.8 (0.04) %  | 6.5 (0.06) %  | 5,153 (38.8)               | 3,501 (21.3)  | 4,647 (40.4)  | 6,213 (6.2)   | 3,203 (28.3)                 | 1,994 (16.6) | 2,758 (25.1) | 3,897 (48.0)  |
| Colombia               | 5.8 (0.04) %          | 3.4 (0.02) %  | 4.9 (0.04) %  | 7.3 (0.06) %  | 1,311 (8.3)                | 764 (5.4)     | 1,118 (9.4)   | 1,667 (1.7)   | 798 (6.3)                    | 419 (2.3)    | 638 (5.1)    | 1,008 (11.5)  |
| Costa Rica             | 0.8 (0.01) %          | 0.2 (0.00) %  | 0.4 (0.00) %  | 1.0 (0.01) %  | 20 (0.2)                   | 4 (0.1)       | 9 (0.1)       | 23 (0.0)      | 10 (0.1)                     | 2 (0.0)      | 4 (0.0)      | 11 (0.1)      |
| Dominican Republic     | 8.6 (0.14) %          | 0.9 (0.03) %  | 3.0 (0.08) %  | 10.0 (0.31) % | 443 (7.1)                  | 44 (1.5)      | 154 (4.2)     | 511 (0.5)     | 296 (5.3)                    | 22 (0.7)     | 79 (2.3)     | 288 (10.2)    |
| Ecuador                | 6.0 (0.03) %          | 2.4 (0.03) %  | 4.2 (0.05) %  | 7.5 (0.06) %  | 411 (2.1)                  | 166 (2.1)     | 292 (3.2)     | 519 (0.5)     | 240 (1.5)                    | 87 (1.1)     | 157 (1.9)    | 294 (2.0)     |
| El Salvador            | 3.8 (0.01) %          | 2.4 (0.02) %  | 3.3 (0.02) %  | 4.8 (0.01) %  | 112 (0.3)                  | 69 (0.5)      | 98 (0.6)      | 140 (0.1)     | 65 (0.2)                     | 39 (0.3)     | 56 (0.3)     | 81 (0.2)      |
| French Guiana          | 1.4 (0.02) %          | 0.3 (0.01) %  | 0.7 (0.01) %  | 1.6 (0.02) %  | 2 (0.0)                    | 0 (0.0)       | 1 (0.0)       | 2 (0.0)       | 1 (0.0)                      | 0 (0.0)      | 0 (0.0)      | 1 (0.0)       |
| Guatemala              | 4.0 (0.04) %          | 1.5 (0.02) %  | 2.7 (0.03) %  | 5.1 (0.07) %  | 280 (2.8)                  | 103 (1.1)     | 189 (2.4)     | 355 (0.4)     | 163 (1.9)                    | 54 (0.6)     | 102 (1.4)    | 199 (2.8)     |
| Guyana                 | 5.3 (0.07) %          | 1.4 (0.02) %  | 3.0 (0.06) %  | 6.4 (0.12) %  | 20 (0.3)                   | 5 (0.1)       | 11 (0.2)      | 25 (0.0)      | 12 (0.2)                     | 3 (0.1)      | 6 (0.1)      | 13 (0.3)      |
| Haiti                  | 10.3 (0.14) %         | 1.9 (0.05) %  | 5.2 (0.12) %  | 13.2 (0.24) % | 522 (6.9)                  | 94 (2.4)      | 261 (6.1)     | 665 (0.7)     | 349 (5.5)                    | 48 (1.2)     | 141 (3.4)    | 395 (9.6)     |
| Honduras               | 4.6 (0.03) %          | 1.5 (0.02) %  | 2.9 (0.02) %  | 5.8 (0.07) %  | 176 (1.2)                  | 55 (0.9)      | 111 (0.8)     | 219 (0.2)     | 101 (0.8)                    | 28 (0.5)     | 58 (0.5)     | 118 (1.7)     |
| Mexico                 | 1.1 (0.01) %          | 0.8 (0.01) %  | 1.0 (0.01) %  | 1.3 (0.01) %  | 619 (5.7)                  | 430 (5.0)     | 555 (6.1)     | 733 (0.7)     | 327 (3.2)                    | 222 (2.5)    | 291 (3.3)    | 387 (4.4)     |
| Nicaragua              | 3.0 (0.06) %          | 0.6 (0.01) %  | 1.5 (0.02) %  | 3.6 (0.07) %  | 88 (1.7)                   | 18 (0.3)      | 43 (0.7)      | 103 (0.1)     | 51 (1.1)                     | 9 (0.2)      | 22 (0.3)     | 56 (1.2)      |

| Country                | Allele frequency (SE) |               |               |               | G6PDd male population (SE) |                |                |               | G6PDd female population (SE) |                |                |                |
|------------------------|-----------------------|---------------|---------------|---------------|----------------------------|----------------|----------------|---------------|------------------------------|----------------|----------------|----------------|
|                        | Mean                  | Q25%          | Median        | Q75%          | Mean                       | Q25%           | Median         | Q75%          | Mean                         | Q25%           | Median         | Q75%           |
| Panama                 | 2.3 (0.05) %          | 0.4 (0.01) %  | 0.9 (0.02) %  | 2.5 (0.07) %  | 41 (0.9)                   | 6 (0.1)        | 16 (0.3)       | 44 (0.0)      | 23 (0.6)                     | 3 (0.1)        | 8 (0.2)        | 22 (0.7)       |
| Paraguay               | 7.5 (0.09) %          | 1.1 (0.03) %  | 3.2 (0.06) %  | 8.8 (0.21) %  | 244 (2.8)                  | 34 (0.8)       | 105 (1.9)      | 288 (0.3)     | 157 (2.2)                    | 17 (0.4)       | 54 (0.9)       | 163 (3.5)      |
| Peru                   | 0.5 (0.01) %          | 0.1 (0.00) %  | 0.2 (0.00) %  | 0.6 (0.01) %  | 79 (1.2)                   | 13 (0.3)       | 33 (0.5)       | 84 (0.1)      | 43 (0.7)                     | 6 (0.1)        | 17 (0.4)       | 43 (0.8)       |
| Suriname               | 1.1 (0.01) %          | 0.4 (0.01) %  | 0.7 (0.01) %  | 1.3 (0.02) %  | 3 (0.0)                    | 1 (0.0)        | 2 (0.0)        | 3 (0.0)       | 1 (0.0)                      | 1 (0.0)        | 1 (0.0)        | 2 (0.0)        |
| Venezuela              | 13.3 (0.12) %         | 4.0 (0.06) %  | 8.6 (0.09) %  | 18.0 (0.32) % | 1,936 (17.8)               | 583 (9.4)      | 1,251 (13.2)   | 2,617 (2.6)   | 1,325 (15.0)                 | 316 (5.8)      | 732 (10.4)     | 1,701 (35.4)   |
| <b>Eurasian MECs</b>   |                       |               |               |               |                            |                |                |               |                              |                |                |                |
| Afghanistan            | 8.0 (0.06) %          | 5.6 (0.05) %  | 7.4 (0.05) %  | 9.8 (0.08) %  | 1,209 (9.5)                | 845 (7.2)      | 1,115 (8.2)    | 1,470 (1.5)   | 681 (6.0)                    | 436 (3.6)      | 599 (5.2)      | 833 (7.8)      |
| Argentina              | 1.3 (0.03) %          | 0.5 (0.01) %  | 0.9 (0.02) %  | 1.6 (0.04) %  | 261 (5.1)                  | 98 (2.1)       | 169 (3.5)      | 313 (0.3)     | 159 (3.3)                    | 51 (1.1)       | 92 (2.1)       | 181 (5.1)      |
| Azerbaijan             | 10.4 (0.08) %         | 8.9 (0.07) %  | 10.2 (0.09) % | 11.7 (0.09) % | 461 (3.6)                  | 393 (3.2)      | 452 (4.0)      | 518 (0.5)     | 275 (2.4)                    | 228 (2.2)      | 267 (2.6)      | 314 (2.5)      |
| Bangladesh             | 4.7 (0.03) %          | 2.4 (0.01) %  | 3.8 (0.02) %  | 5.9 (0.04) %  | 3,898 (25.1)               | 2,002 (12.1)   | 3,168 (20.3)   | 4,942 (4.9)   | 2,110 (15.5)                 | 1,007 (7.0)    | 1,624 (12.3)   | 2,636 (19.4)   |
| Bhutan                 | 7.4 (0.05) %          | 3.6 (0.04) %  | 5.9 (0.06) %  | 9.6 (0.11) %  | 28 (0.2)                   | 14 (0.1)       | 23 (0.2)       | 37 (0.0)      | 15 (0.1)                     | 6 (0.1)        | 11 (0.1)       | 18 (0.2)       |
| Cambodia               | 14.8 (0.03) %         | 11.8 (0.05) % | 14.3 (0.04) % | 17.2 (0.05) % | 1,089 (2.1)                | 871 (3.4)      | 1,055 (3.3)    | 1,268 (1.3)   | 685 (1.6)                    | 522 (2.2)      | 653 (1.7)      | 811 (3.2)      |
| China                  | 5.7 (0.04) %          | 3.5 (0.04) %  | 4.7 (0.05) %  | 6.8 (0.05) %  | 41,186 (314.1)             | 25,014 (273.3) | 33,675 (350.2) | 48,717 (48.7) | 23,765 (192.0)               | 13,427 (164.0) | 18,555 (204.4) | 27,859 (222.7) |
| Dem People's Rep Korea | 0.7 (0.02) %          | 0.0 (0.00) %  | 0.1 (0.00) %  | 0.4 (0.01) %  | 78 (2.8)                   | 2 (0.0)        | 10 (0.2)       | 42 (0.0)      | 46 (2.0)                     | 1 (0.0)        | 5 (0.1)        | 22 (0.4)       |
| Georgia                | 1.3 (0.01) %          | 0.7 (0.01) %  | 1.1 (0.02) %  | 1.7 (0.02) %  | 26 (0.3)                   | 14 (0.2)       | 21 (0.3)       | 33 (0.0)      | 15 (0.2)                     | 8 (0.1)        | 12 (0.2)       | 19 (0.2)       |
| India                  | 8.2 (0.03) %          | 6.9 (0.03) %  | 8.0 (0.03) %  | 9.3 (0.04) %  | 51,368 (204.6)             | 43,246 (188.0) | 50,009 (218.2) | 57,985 (58.0) | 28,756 (132.1)               | 23,452 (122.3) | 27,708 (121.3) | 32,947 (175.5) |
| Indonesia              | 7.7 (0.05) %          | 5.3 (0.05) %  | 7.1 (0.05) %  | 9.4 (0.06) %  | 8,948 (53.9)               | 6,180 (55.8)   | 8,204 (57.0)   | 10,901 (10.9) | 5,494 (37.8)                 | 3,484 (30.6)   | 4,856 (40.1)   | 6,756 (51.7)   |
| Iran (Islamic Rep of)  | 12.3 (0.05) %         | 9.9 (0.04) %  | 11.8 (0.05) % | 14.1 (0.06) % | 4,672 (20.8)               | 3,788 (15.7)   | 4,510 (20.7)   | 5,356 (5.4)   | 2,803 (13.8)                 | 2,186 (11.9)   | 2,661 (13.0)   | 3,256 (13.8)   |
| Iraq                   | 11.2 (0.03) %         | 8.1 (0.03) %  | 10.6 (0.04) % | 13.5 (0.05) % | 1,762 (5.1)                | 1,279 (5.3)    | 1,669 (6.0)    | 2,130 (2.1)   | 1,056 (3.5)                  | 720 (4.0)      | 970 (4.1)      | 1,297 (6.1)    |
| Korea, Rep of          | 0.8 (0.02) %          | 0.1 (0.00) %  | 0.2 (0.00) %  | 0.6 (0.01) %  | 182 (4.7)                  | 17 (0.4)       | 50 (1.1)       | 145 (0.1)     | 100 (2.8)                    | 8 (0.2)        | 24 (0.5)       | 72 (1.4)       |
| Kyrgyzstan             | 1.6 (0.04) %          | 0.1 (0.00) %  | 0.3 (0.01) %  | 1.2 (0.04) %  | 43 (1.1)                   | 3 (0.1)        | 9 (0.2)        | 33 (0.0)      | 26 (0.9)                     | 1 (0.0)        | 5 (0.1)        | 17 (0.6)       |
| Lao People's Dem Rep   | 16.6 (0.08) %         | 11.6 (0.09) % | 15.6 (0.11) % | 20.5 (0.11) % | 533 (2.5)                  | 372 (2.9)      | 500 (3.6)      | 657 (0.7)     | 350 (1.9)                    | 224 (2.1)      | 315 (2.9)      | 437 (2.8)      |
| Malaysia               | 8.3 (0.04) %          | 6.6 (0.04) %  | 8.0 (0.05) %  | 9.6 (0.06) %  | 1,177 (5.9)                | 942 (5.2)      | 1,129 (6.5)    | 1,359 (1.4)   | 669 (3.7)                    | 506 (3.2)      | 627 (4.0)      | 782 (5.0)      |
| Myanmar                | 7.4 (0.03) %          | 4.1 (0.03) %  | 6.1 (0.03) %  | 9.3 (0.04) %  | 1,833 (7.8)                | 1,028 (6.2)    | 1,523 (7.3)    | 2,309 (2.3)   | 1,115 (6.0)                  | 577 (3.9)      | 880 (5.9)      | 1,384 (5.6)    |
| Nepal                  | 7.2 (0.06) %          | 2.9 (0.02) %  | 5.3 (0.03) %  | 9.4 (0.11) %  | 1,070 (8.8)                | 436 (3.4)      | 786 (4.2)      | 1,390 (1.4)   | 648 (6.5)                    | 230 (2.0)      | 434 (3.2)      | 814 (10.2)     |
| Pakistan               | 16.2 (0.09) %         | 10.8 (0.07) % | 15.0 (0.11) % | 20.4 (0.16) % | 15,626 (90.9)              | 10,393 (63.4)  | 14,495 (108.4) | 19,648 (19.6) | 10,150 (75.4)                | 5,984 (50.3)   | 8,900 (71.1)   | 13,089 (130.8) |
| Papua New Guinea       | 7.9 (0.04) %          | 6.0 (0.03) %  | 7.4 (0.04) %  | 9.3 (0.05) %  | 277 (1.5)                  | 212 (1.0)      | 261 (1.5)      | 325 (0.3)     | 157 (1.0)                    | 114 (0.6)      | 143 (1.0)      | 185 (1.0)      |
| Philippines            | 2.5 (0.01) %          | 2.4 (0.01) %  | 2.5 (0.01) %  | 2.5 (0.01) %  | 1,153 (6.1)                | 1,117 (5.9)    | 1,151 (6.0)    | 1,187 (1.2)   | 581 (3.2)                    | 556 (3.0)      | 580 (3.2)      | 604 (3.6)      |
| Saudi Arabia           | 12.9 (0.06) %         | 10.4 (0.08) % | 12.4 (0.07) % | 14.9 (0.05) % | 1,877 (8.1)                | 1,511 (11.7)   | 1,794 (9.7)    | 2,161 (2.2)   | 957 (4.5)                    | 741 (6.6)      | 899 (5.8)      | 1,113 (4.7)    |
| Solomon Islands        | 24.0 (0.11) %         | 15.7 (0.11) % | 22.3 (0.13) % | 30.9 (0.17) % | 66 (0.3)                   | 43 (0.3)       | 62 (0.4)       | 86 (0.1)      | 43 (0.2)                     | 25 (0.2)       | 38 (0.2)       | 56 (0.4)       |
| Sri Lanka              | 3.0 (0.03) %          | 2.6 (0.02) %  | 2.9 (0.03) %  | 3.3 (0.03) %  | 299 (2.7)                  | 258 (2.5)      | 291 (2.7)      | 331 (0.3)     | 168 (1.7)                    | 140 (1.3)      | 161 (1.7)      | 188 (1.7)      |
| Tajikistan             | 1.7 (0.03) %          | 0.4 (0.01) %  | 0.8 (0.02) %  | 1.9 (0.03) %  | 59 (1.0)                   | 12 (0.2)       | 29 (0.6)       | 66 (0.1)      | 33 (0.7)                     | 6 (0.1)        | 15 (0.3)       | 34 (0.5)       |
| Thailand               | 13.8 (0.06) %         | 11.9 (0.06) % | 13.6 (0.06) % | 15.5 (0.05) % | 4,636 (19.0)               | 3,981 (18.6)   | 4,544 (20.0)   | 5,188 (5.2)   | 2,923 (13.4)                 | 2,428 (13.6)   | 2,830 (14.8)   | 3,312 (12.6)   |

| Country     | Allele frequency (SE) |              |              |               | G6PDd male population (SE) |              |              |             | G6PDd female population (SE) |              |              |              |
|-------------|-----------------------|--------------|--------------|---------------|----------------------------|--------------|--------------|-------------|------------------------------|--------------|--------------|--------------|
|             | Mean                  | Q25%         | Median       | Q75%          | Mean                       | Q25%         | Median       | Q75%        | Mean                         | Q25%         | Median       | Q75%         |
| Timor-Leste | 7.5 (0.07) %          | 2.5 (0.03) % | 5.0 (0.05) % | 9.7 (0.11) %  | 44 (0.4)                   | 15 (0.2)     | 29 (0.3)     | 58 (0.1)    | 25 (0.3)                     | 7 (0.1)      | 15 (0.2)     | 31 (0.5)     |
| Turkey      | 4.1 (0.04) %          | 3.0 (0.03) % | 3.8 (0.04) % | 4.9 (0.05) %  | 1,551 (14.8)               | 1,128 (12.1) | 1,437 (14.8) | 1,850 (1.9) | 863 (8.8)                    | 601 (6.9)    | 783 (8.3)    | 1,034 (12.8) |
| Uzbekistan  | 2.2 (0.04) %          | 0.4 (0.01) % | 1.0 (0.01) % | 2.4 (0.04) %  | 298 (5.4)                  | 53 (0.9)     | 132 (1.4)    | 330 (0.3)   | 176 (3.8)                    | 27 (0.5)     | 68 (0.9)     | 179 (3.6)    |
| Vanuatu     | 8.2 (0.03) %          | 6.9 (0.02) % | 8.0 (0.03) % | 9.3 (0.04) %  | 10 (0.0)                   | 9 (0.0)      | 10 (0.0)     | 12 (0.0)    | 6 (0.0)                      | 4 (0.0)      | 5 (0.0)      | 6 (0.0)      |
| Viet Nam    | 10.8 (0.11) %         | 6.0 (0.06) % | 8.9 (0.10) % | 13.9 (0.15) % | 4,745 (46.5)               | 2,625 (24.5) | 3,902 (43.1) | 6,102 (6.1) | 3,098 (36.6)                 | 1,488 (15.5) | 2,310 (33.0) | 3,922 (54.1) |
| Yemen       | 8.4 (0.08) %          | 1.9 (0.04) % | 4.6 (0.06) % | 10.9 (0.15) % | 1,031 (9.9)                | 238 (5.2)    | 565 (7.0)    | 1,329 (1.3) | 656 (7.2)                    | 121 (2.8)    | 308 (4.7)    | 781 (11.9)   |
